# Supplementary material
Source: MDPI journal article supplement (https://www.mdpi.com/2077-0472/10/8/315)
Supplement: s1 [file s1]

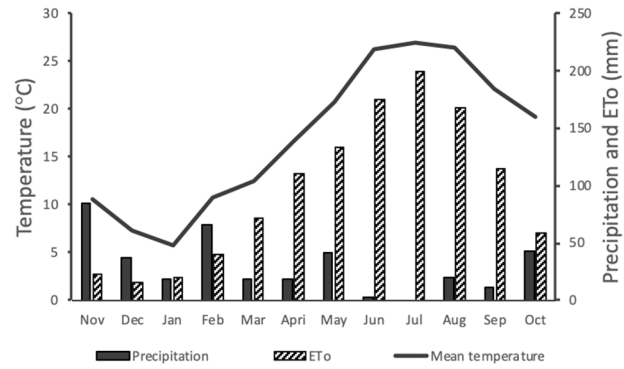

**Figure S1.** Monthly mean temperature (line) and total precipitation and reference evapotranspiration, ETo (bars) recorded at the experimental site from November 2016 to October 2017.

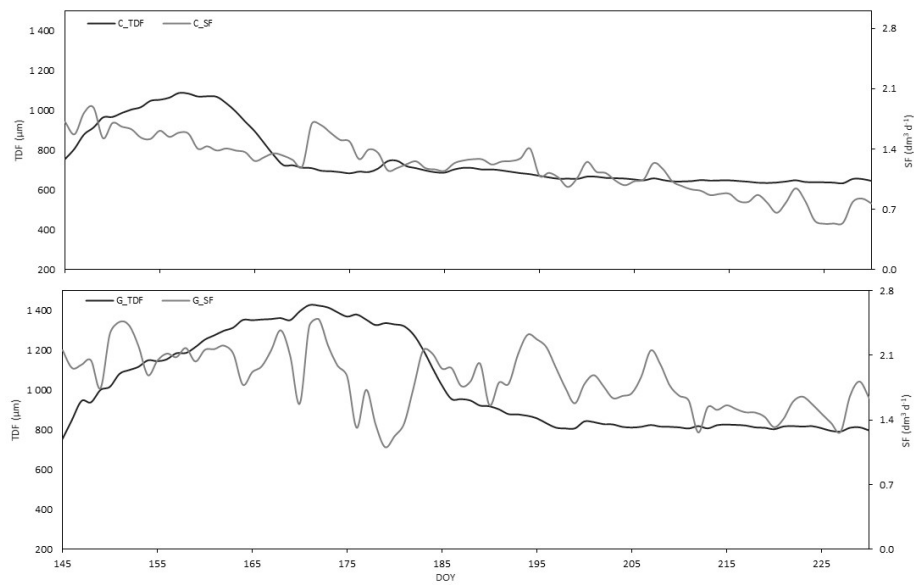

**Figure S2.** Daily means of trunk diameter fluctuations (TDF) and daily values (sums) of sap flow (SF) in Touriga-Nacional trained in the Cordon (C) and Guyot (G) systems during the 2017-growing season.
